# Supplementary material
Source: Elsevier journal article supplement (https://www.sciencedirect.com/science/article/pii/S2341287920300594)
Supplement: mmc3 [file S2341287920300594:mmc3.pdf]

**Tabla Suplementaria 3.** Consideraciones sobre la formación en primeros auxilios.

| <b><i>Considero que la formación en primeros auxilios... (Se podía responder más de una)</i></b>                                                                                                                                                 |            |
|--------------------------------------------------------------------------------------------------------------------------------------------------------------------------------------------------------------------------------------------------|------------|
| Es exclusivamente cosa de servicios sanitarios o personal cualificado como socorristas, bomberos o policías...                                                                                                                                   | 0 (0,0)    |
| Debería conocer las nociones básicas toda persona que tenga/trabaje con niños/as                                                                                                                                                                 | 207 (44,0) |
| Es útil, nunca sabes en qué momento puedes precisar de esta formación                                                                                                                                                                            | 194 (41,3) |
| Todo el mundo debería tener nociones básicas de primeros auxilios                                                                                                                                                                                | 391 (83,2) |
| Otros:<br>Se debería impartir obligatoriamente en centros educativos / Debería ser materia obligatoria en colegios de primaria y secundaria / Quien la practique debe estar respaldado legalmente independientemente del éxito de las maniobras. | 3 (0,6)    |
| <b><i>Los primeros auxilios deberían ser un contenido obligatorio en el sistema educativo</i></b>                                                                                                                                                |            |
| Totalmente de acuerdo                                                                                                                                                                                                                            | 375 (79,8) |
| De acuerdo                                                                                                                                                                                                                                       | 87 (18,5)  |
| En desacuerdo                                                                                                                                                                                                                                    | 8 (1,7)    |
| Totalmente en desacuerdo                                                                                                                                                                                                                         | 0 (0,0)    |
| <b><i>¿Deberían los primeros auxilios formar parte de los planes de estudios de carreras universitarias destinadas a formar al futuro profesorado? (Ej. Maestro/a en Educación Infantil / Maestro/a en Educación Primaria)</i></b>               |            |
| Sí                                                                                                                                                                                                                                               | 455 (96,8) |
| No                                                                                                                                                                                                                                               | 15 (3,2)   |

Datos expresados mediante frecuencias absolutas (frecuencias relativas)

fi: Frecuencia absoluta

hi: Frecuencia relativa
